# Supplementary material for: Androgen receptor in Sertoli cells regulates DNA double-strand break repair and chromosomal synapsis of spermatocytes partially through intercellular EGF-EGFR signaling
Source: PubMed Central journal article supplement (PMC4951324; doi:10.18632/oncotarget.7916), 2016-03-04
Supplement: oncotarget-07-18722-s001.pdf [file oncotarget-07-18722-s001.pdf]

## Androgen receptor in sertoli cells regulates DNA double-strand break repair and chromosomal synapsis of spermatocytes partially through intercellular EGF-EGFR signaling

### Supplementary Materials

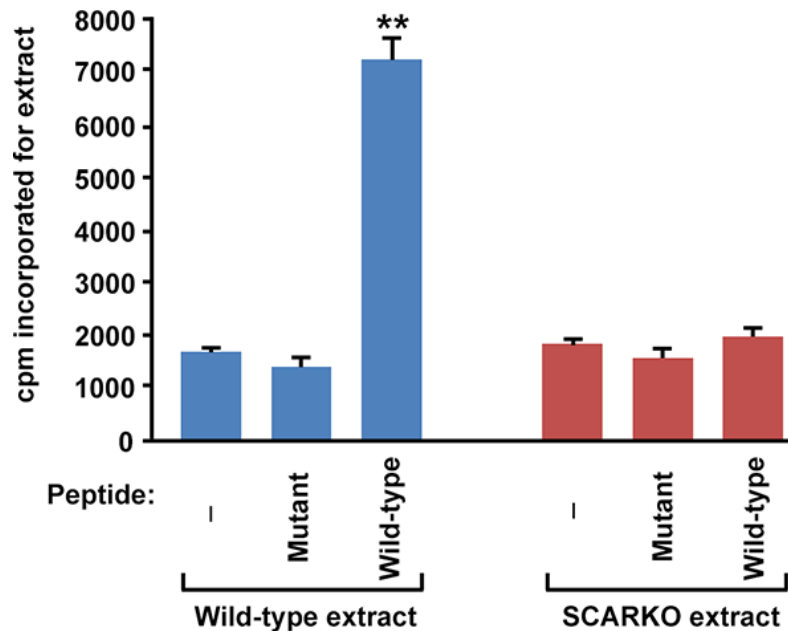

**Supplementary Figure S1: The DNA-PK pull-down peptide assay detects DNA-PK in spermatocyte extracts.** Whole cell extract (150  $\mu$ g) from wild-type or SCARKO spermatocytes was used in a DNA-PK pull-down peptide phosphorylation assay with wild-type or mutant p53 peptide or in the absence of peptide (-). Data are expressed as the mean  $\pm$  SEM. \*\* $p < 0.01$ .

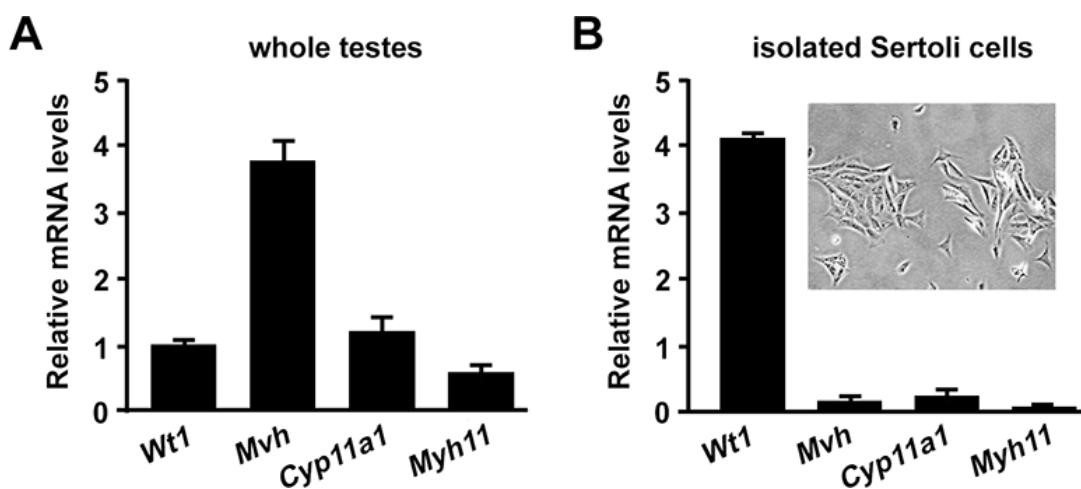

**Supplementary Figure S2: High-purity of sertoli cells.** The purity of Sertoli cells was confirmed by qRT-PCR of *Wt1* (Sertoli cell marker), *Mvh* (Germ cell marker), *Cyp11a1* (Leydig cell marker) and *Myh11* (Peritubular myoid cell marker) in both whole testes (A) and isolated Sertoli cells (B).

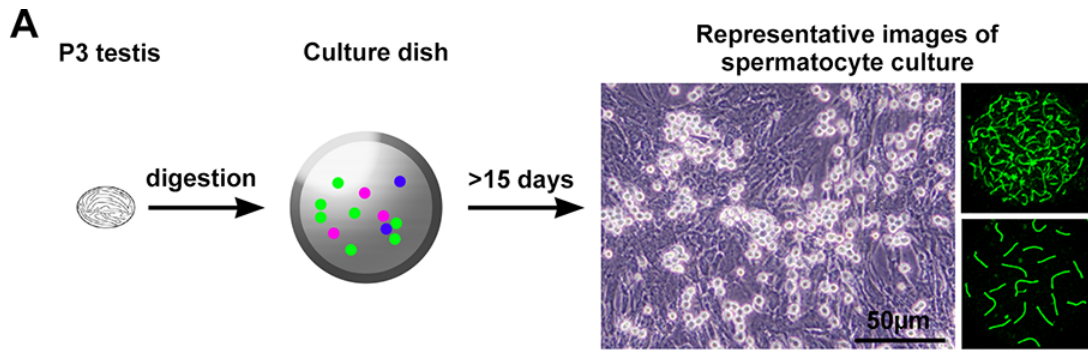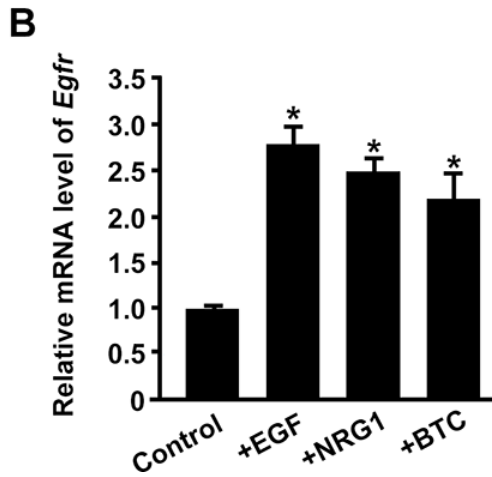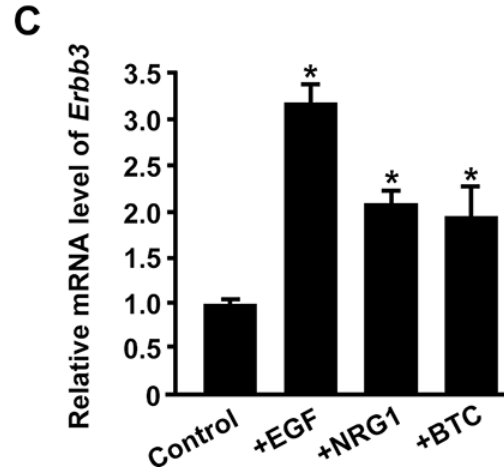

**Supplementary Figure S3: Up-regulation of EGF receptors in spermatocytes is a ligand-dependent action.** (A) Model for *in vitro* spermatocyte culture systems and representative images of spermatocyte culture. (B, C) The mRNA levels of EGF receptors (EGFR and ERBB4) after addition of EGF ligands (EGF, NRG1 and BTC) in *in vitro* spermatocyte culture systems. Data are expressed as the mean  $\pm$  SEM. \* $p < 0.05$ .

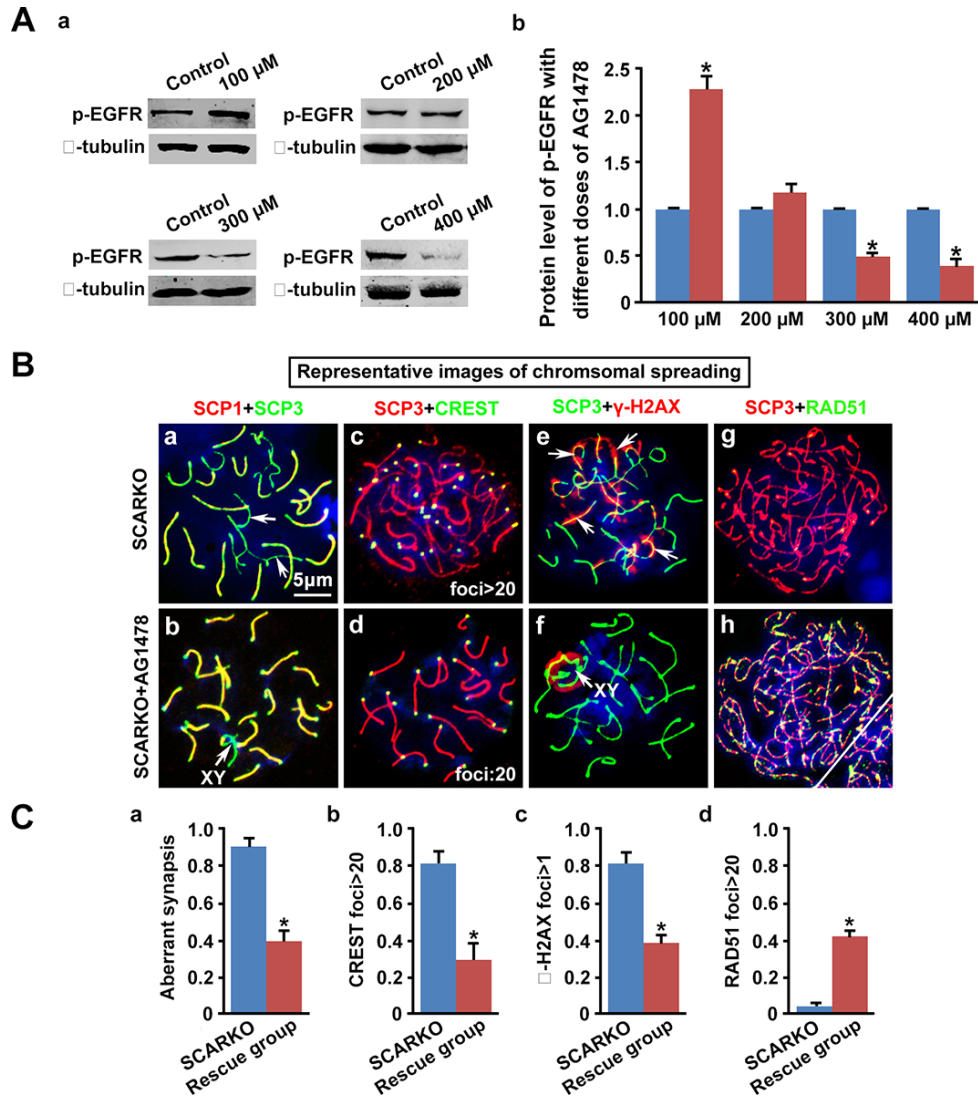

**Supplementary Figure S4: EGFR phosphorylation-inhibitor AG1478 (200  $\mu\text{M}$ ) partially restored meiosis.** (A) The protein level of p-EGFR in cultured SCARKO testis tissues by different doses (100  $\mu\text{M}$ –400  $\mu\text{M}$ ) AG1478 treatment for 3 days. (B) Representative images of chromosomal spreading of spermatocytes from cultured SCARKO and 200  $\mu\text{M}$  inhibitor-treated SCARKO testis tissues, stained with meiosis-associated markers, including SCP1, SCP3, CREST,  $\gamma$ -H2AX and RAD51. Arrows in a and e indicate unpaired chromosomes and  $\gamma$ -H2AX foci on asynapsed autosomal homologs, respectively. Scale bar, 5  $\mu\text{m}$ . (C) Percentage of spermatocytes with aberrant synapsis (a), CREST foci > 20 (b),  $\gamma$ -H2AX > 1 (c) and RAD51 foci > 20 (d) in SCARKO and rescue group (200  $\mu\text{M}$  inhibitor-treated SCARKO). Data are expressed as the mean  $\pm$  SEM. \* $p < 0.05$ .

**Supplementary Table 1: Primary and secondary antibodies used in this study**

|                       |        |                |             |        |
|-----------------------|--------|----------------|-------------|--------|
| Mouse anti-SCP3       | 1/400  | Abeam          | ab97672     | IF     |
| Rabbit anti-SCP1      | 1/400  | Abeam          | ab15090     | IF     |
| CREST antiserum       | 1/400  | Antibodies Inc | 15-234-0001 | IF     |
| Rabbit anti-yH2AX     | 1/400  | Abeam          | ab11174     | IF     |
| Rabbit anti-RAD51     | 1/500  | Millipore      | ABE257      | IF, WB |
| Rabbit anti-MLH1      | 1/400  | Abeam          | ab92312     | IF     |
| Rabbit anti-EGF       | 1/400  | Abeam          | ab9695      | IF, WB |
| Rabbit anti-NRG1      | 1/400  | Abeam          | ab27303     | IF, WB |
| Rabbit anti-NRG3      | 1/400  | Abeam          | ab109256    | IF     |
| Goat anti-p-EGFR      | 1/400  | Epitomics      | 1727-1      | IF, WB |
| Mouse anti-ERBB4      | 1/500  | Millipore      | 05-1133     | IF, WB |
| Rabbit anti-DDX4      | 1/400  | Abeam          | ab13840     | IF     |
| Mouse anti-AR         | 1/400  | Abeam          | ab9474      | IF     |
| Mouse anti-PLZF       | 1/200  | Santa Cruz     | se-28319    | IF     |
| Rabbit anti-SP011     | 1/1000 | Abeam          | ab81695     | WB     |
| Mouse anti-p-ATM      | 1/500  | Cell Signaling | #4526       | WB     |
| Rabbit anti-p-ATR     | 1/500  | Cell Signaling | #2853       | WB     |
| Goat anti-DMC1        | 1/500  | Santa Cruz     | sc-8973     | WB     |
| Rabbit anti-TEX15     | 1/1000 | Proteintech    | 24585-1-AP  | WB     |
| Rabbit anti-BRCA1     | 1/500  | Santa Cruz     | se-642      | WB     |
| Rabbit anti-BRCA2     | 1/500  | Santa Cruz     | se-28235    | WB     |
| Goat anti-PALB2       | 1/500  | Santa Cruz     | sc-160647   | WB     |
| Rabbit anti-DAZL      | 1/500  | AbD Serotec    | MCA2336     | IF     |
| Rabbit anti-TRS4      | 1/200  | Our lab        | -           | IF     |
| Rabbit anti-p-tubulin | 1/1000 | Abeam          | ab6046      | WB     |

**Supplementary Table 2: Primers used in this study**

|                |          |                             |          |                                  |
|----------------|----------|-----------------------------|----------|----------------------------------|
| <i>Egf</i>     | Forward: | AGCATCTCTCGGATTGACCCA       | Reverse: | CCT GTCCCGTTAAGGAAAACCT CT       |
| <i>Hbegf</i>   | Forward: | CGGGGAGTGCAGATACCTG         | Reverse: | TTCTCCACTGGTAGAGTCAGC            |
| <i>Tgfa</i>    | Forward: | CACTCTGGGTACGTGGGTG         | Reverse: | CACAGGTGATAATGAGGACAGC           |
| <i>Areg</i>    | Forward: | GGTCTTAGGCTCAGGCCATTA       | Reverse: | CGCTTATGGTGGAAACCTCTC            |
| <i>Ereg</i>    | Forward: | CTGCCT CTTGGGTCTT G ACG     | Reverse: | GCGGTACAGTTATCCTCGGATTC          |
| <i>Epgn</i>    | Forward: | CAGAAGCCAAGTT CACTA         | Reverse: | CTTTGCTATTAG GT CC AT            |
| <i>Nrg1</i>    | Forward: | ATGGAGATTTATCCCCAGACA       | Reverse: | GTT GAGGCACCCT CT GAG AC         |
| <i>Nrg2</i>    | Forward: | GGATGGCAAGGAACTCAACC        | Reverse: | T CGGCCT CACAG ACGTACT           |
| <i>Nrg3</i>    | Forward: | TTACGCT GTAGCGACTGCAT C     | Reverse: | GCCTACCACGATCCATTTAAGC           |
| <i>Nrg4</i>    | Forward: | CACGCTGCGAAGAGGTTTTTC       | Reverse: | CGCGATGGTAAGAGTGAGGA             |
| <i>Egfr</i>    | Forward: | GCCATCTGGGCCAAAGATACC       | Reverse: | GTCTTCGCATGAATAGGCCAAT           |
| <i>ErbB2</i>   | Forward: | GAGACAGAGCTAAGGAAGCT GA     | Reverse: | ACGGGGATTTTCACGTTCTCC            |
| <i>ErbB3</i>   | Forward: | AAGT G ACAGGCTAT GTACTGGT   | Reverse: | GCTGG AGTTGGTATT GTAGTT CA       |
| <i>ErbB4</i>   | Forward: | GTGCTATGGACCCTACGTTAGT      | Reverse: | T C ATT G AAGTT CAT G C AGG C AA |
| <i>Wt1</i>     | Forward: | GAGAGCCAGCCTACCATCC         | Reverse: | GGGTCCCTCGTGTTTGAAGGAA           |
| <i>Mvh</i>     | Forward: | ATGTCT G CC AC AACTT CT GAG | Reverse: | CT G ATTTCCGGTTT CATCCATCCT      |
| <i>Cyp11a1</i> | Forward: | AGGTCCTTCAATGAGATCCCTT      | Reverse: | TCCCTGTAAATGGGGCCATAC            |
| <i>Myh11</i>   | Forward: | AAGCTGCGGCTAGAGGTCA         | Reverse: | CCCTCCCTTT G ATGGCT GAG          |
| <i>Gapdh</i>   | Forward: | TGGATTTGGACGCATTGGTC        | Reverse: | TTTGCACTGGTACGTGTTGAT            |
